# Supplementary material for: Tartrate-resistant acid phosphatase (TRAP/ACP5) promotes metastasis-related properties via TGFβ2/TβR and CD44 in MDA-MB-231 breast cancer cells
Source: Springer Nature journal article supplement (doi:10.1186/s12885-017-3616-7), 2017-09-15

A

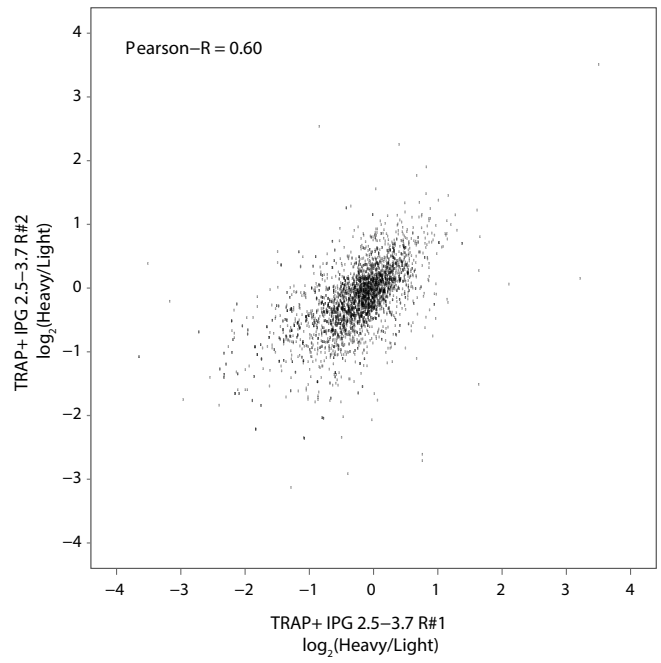

B

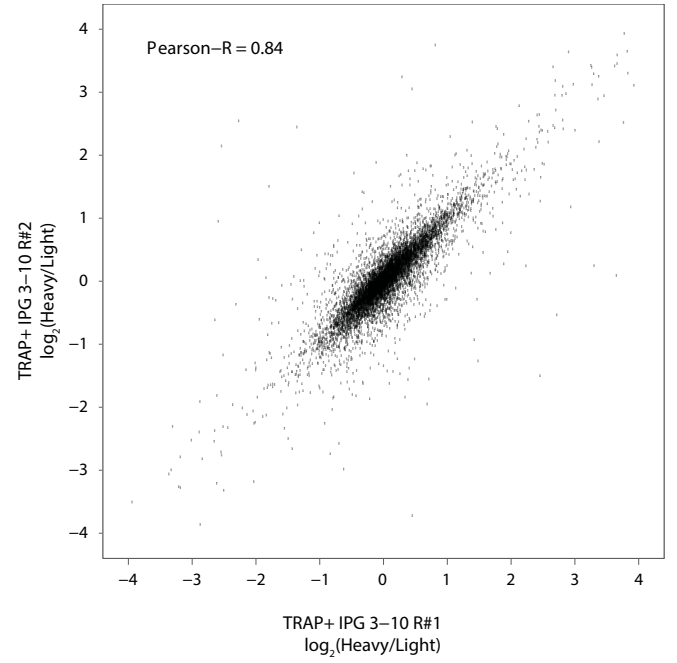

Supplement: MOESM3 [file 15063322]
